# Supplementary material for: Drastic shrinking of the Hadley circulation during the mid-Cretaceous Supergreenhouse
Source: Copernicus journal article supplement (doi:10.5194/cp-8-1323-2012), 2012-08-23
Supplement: Supplementary file 1 [file cp-8-1323-2012-supplement.pdf]

# **Drastic shrinking of the Hadley circulation during the mid-Cretaceous Supergreenhouse**

H. Hasegawa, R. Tada, X. Jiang, Y. Suganuma, S. Imsamut, C. Punya, N. Ichinnorov, Y. Khand

## **Supplementary Material**

**Table S1:** Paleontological age constraints of the Cretaceous terrestrial deposits in the Asian interior basins

**Table S2:** Stratigraphic compilation of the climate-sensitive sediments with special emphasis on desert (eolian dune) deposits cited in **Figure 3**.

**Supplementary Methods:** Paleoposition and Age constraints for the eolian sandstone formations in the Asian interior basins

**Figure S1:** Lithostratigraphic column, paleowind direction data, and magnetic polarity sequence of the eolian sandstone deposits (Jiaguan Formation) in Sichuan Basin, south China

**Figure S2:** Lithostratigraphic column, paleowind direction data, and magnetic polarity sequence of the eolian sandstone deposits (Phu Thok Formation) in the Khorat Basin, northeast Thailand

## **Supplementary References**

**Table S1:** Paleontological age constraints of the Cretaceous terrestrial deposits in the Asian interior basins based on the fossil assemblages of ostracods, charophytes, pollen and spores (modified after, Li, 1982; Racey et al., 1996; Hao et al., 2000; Khand et al., 2000; Meesok, 2000; Chen et al., 2006; Sha, 2007; Hasegawa et al., 2010).

### Gobi Basin

| Formation      | Lithology                                                                                             | Fossil assemblage                                                                                                                                                                                                                                                                                                                                   | Age       |
|----------------|-------------------------------------------------------------------------------------------------------|-----------------------------------------------------------------------------------------------------------------------------------------------------------------------------------------------------------------------------------------------------------------------------------------------------------------------------------------------------|-----------|
| Tsagantsav Fm  | Reddish brown to whitish grey, conglomerate and sandstone, reddish brown mudstone, calcretes, basalts | Ostracodes: <i>Cypridea unicastata</i><br>Plants: <i>Baiera manchurica</i> , <i>Cladophiledis onychiopsis</i> , <i>Nilssoniopteris denticulata</i>                                                                                                                                                                                                  | Ber.–Brm. |
| Shinehudag Fm  | Greenish grey to whitish grey, siltstone and mudstone                                                 | Ostracodes: <i>Cypridea fasciculata</i><br>Charophytes: <i>Aclistochara caii</i> , <i>Raskyella sp.</i><br>Pollen and Spores: <i>Cicatricosisporites australiensis</i> , <i>Densoisporites velatus</i> , <i>Pilosisporites trichopapilosus</i>                                                                                                      | Brm?–Apt. |
| Khukhteeg Fm   | Whitish grey to brown, conglomerate, sandstone, mudstone, and lignites                                | Ostracodes: <i>Cypridea acutituberculata</i> , <i>Tsetsenia mira</i> , <i>Trapeoidella khandae</i> , <i>Janinella tsaganensis</i><br>Charophytes: <i>Atopochara trivolvis</i> , <i>Mesochara voluta</i> , <i>M. tuzsoni</i><br>Pollen and Spores: <i>Foraminisporites assemmetricus</i> , <i>Alisporites elongatus</i> , <i>Abiespollenites sp.</i> | Alb.      |
| Bayanshiree Fm | Reddish brown to whitish grey, conglomerate, sandstone, mudstone, and calcretes                       | Ostracodes: <i>Lycocypris baishintsavica</i> ,<br>Charophytes: <i>Atopochara multivolvis</i> , <i>Caucasuella gulistanica</i>                                                                                                                                                                                                                       | Cen.–San. |
| Djadokhta Fm   | Reddish to reddish brown, eolian sandstone and mudstone                                               | Ostracodes: <i>Gobiocypris tugrigensis</i>                                                                                                                                                                                                                                                                                                          | e. Camp.  |
| Barungoyot Fm  | Reddish to reddish brown, eolian sandstone and mudstone                                               | Ostracodes: <i>Talicypridea abdarantica</i>                                                                                                                                                                                                                                                                                                         | l. Camp.  |
| Nemegt Fm      | Reddish brown to whitish grey, conglomerate, sandstone, mudstone, and calcretes                       | Ostracodes: <i>Talicypridea reticulata</i> , <i>Mongolocypris distributa</i><br>Charophytes: <i>Mongololiachara mesochara</i>                                                                                                                                                                                                                       | e. Maas.  |
| Dzunmod Fm     | Reddish brown to whitish grey, eolian sandstone, mudstone, and calcretes                              | no fossils                                                                                                                                                                                                                                                                                                                                          | m. Maas.  |

### Ordos Basin

| Formation             | Lithology                                                                          | Fossil assemblage                                                                                                                                                                                                                                                                                           | Age       |
|-----------------------|------------------------------------------------------------------------------------|-------------------------------------------------------------------------------------------------------------------------------------------------------------------------------------------------------------------------------------------------------------------------------------------------------------|-----------|
| Luohe Fm              | Red to purple, fine- to medium-grained, eolian sandstone                           | Ostracodes: <i>Darwinula contracta</i><br>Vertebrates: <i>Lycoptera sp.</i>                                                                                                                                                                                                                                 | Ber.–Vlg. |
| Huanhe Fm (Huachi Fm) | Yellowish-green to reddish-purple, fine-grained sandstone, siltstone, and mudstone | Ostracodes: <i>Cypridea unicastata</i> , <i>C. koskulensis</i> , <i>Rhinocypris cirrita</i><br>Dinosaurs: <i>Psittacosaurus sp.</i>                                                                                                                                                                         | Vlg.      |
| Luohangdong Fm        | Red to purple, fine- to medium-grained, eolian sandstone                           | Ostracodes: <i>Cypridea vitimensis</i> , <i>C. consulta</i> , <i>C. koskulensis</i> , <i>Clinocypris scolia</i> , <i>Rhinocypris cirrita</i> , <i>Lycocypris infantilis</i> , <i>Darwinula simplus</i> , <i>Rhinocypris foveata</i> , <i>Djungarica stolidia</i><br>Dinosaurs: <i>Psittacosaurus youngi</i> | Vlg.–Hau. |
| Jingchuang Fm         | Yellowish-green to reddish-purple, fine-grained sandstone, siltstone, and mudstone | Ostracodes: <i>Cypridea unicastata</i> , <i>C. yumenensis</i> , <i>C. justa</i> , <i>C. koskulensis</i> , <i>C. consulta</i> , <i>C. subrostrata</i> , <i>Pseudocypridina globra</i> , <i>Clinocypris scolia</i> , <i>Lycocypris infantilis</i> , <i>Jungarica stolidia</i> , <i>Rhinocypris</i>            | Hau.–Brm. |

|              |                                                                                          |                                                                                                                                                                                                                                                            |            |
|--------------|------------------------------------------------------------------------------------------|------------------------------------------------------------------------------------------------------------------------------------------------------------------------------------------------------------------------------------------------------------|------------|
|              |                                                                                          | <i>foveata</i> , <i>R. cirrita</i><br>Pollen and Spores: <i>Cicatricosis porites</i> , <i>Densois porites</i> , <i>Piceae pollenites</i><br>Dinosaurs: <i>Psittacosaurus youngi</i>                                                                        |            |
| Lamawan Fm   | Yellowish-grey to whitish-grey, medium- to coarse-grained sandstone, mudstone, and coals | Plants: <i>Elatocladus manchuricus</i> , <i>E. obtusifolia</i> , <i>Brachyphyllum japonicum</i> , <i>Sphenolepidium sp.</i> , <i>Coniopteris onychioides</i> , <i>Czekanowskia rigida</i> , <i>Podozamites lanoeolatus</i> , <i>Stenorachis bulunensis</i> | Brm.–Apt.  |
| Tegaimiao Fm | Red to orange, fine- to medium-grained, eolian sandstone                                 | Dinosaurs: <i>Protoceratops sp.</i>                                                                                                                                                                                                                        | San.–Camp. |

### Tarim Basin

| Formation   | Lithology                                                                 | Fossil assemblage                                                                                                                                                                                                                                                                                                                                                                                                     | Age         |
|-------------|---------------------------------------------------------------------------|-----------------------------------------------------------------------------------------------------------------------------------------------------------------------------------------------------------------------------------------------------------------------------------------------------------------------------------------------------------------------------------------------------------------------|-------------|
| Kezilesu Gp | Red to purple, conglomerate, sandstone, and sandy mudstone                | Ostracodes: <i>Darwinnela contracta</i> , <i>Cypridea koskulensis</i> , <i>Lycoperocypris circulata</i> , <i>Rhinocypris cirrita</i> ,<br>Charophytes: <i>Cicatricosisporites sp.</i> , <i>Crybelospprites sp.</i><br>Pollen and Spores: <i>Cicatricosis porites</i> , <i>Schizaeois certus</i> , <i>Dicheiropollis etrusus</i> , <i>Crybelospprites sp.</i> , <i>Clavatipollenites sp.</i> , <i>Liliacidites sp.</i> | Ber.–Brm.   |
| Kumutake Fm | Red to orange, pebbly sandstone, sandstone, and mudstone                  | Ostracodes: <i>Talicypridea meliora</i> , <i>T. gemma</i> , <i>Cypridea cavernosa</i> , <i>C. rostrata</i> , <i>Zizophocypris simakovi</i> , <i>Candoniella mordvilkoii</i>                                                                                                                                                                                                                                           | Con.–Camp.  |
| Subashi Fm  | Whitish-grey to reddish, medium to coarse-grained sandstone, and mudstone | Ostracodes: <i>Cypridea mosuowanensi</i> , <i>Talicypridea amoena</i> , <i>T. gemma</i> , <i>T. retusa</i><br>Dinosaurs: <i>Tarbosaurus sp.</i> , <i>Nemegtosaurus pachi</i> , <i>Oolithes spherides</i> , <i>Mongolimys turfanensis</i> , <i>Shanshanosaurus huoyanshanensis</i>                                                                                                                                     | Camp.–Maas. |

### Subei Basin

| Formation       | Lithology                                                         | Fossil assemblage                                                                                                                                                                                                                                 | Age        |
|-----------------|-------------------------------------------------------------------|---------------------------------------------------------------------------------------------------------------------------------------------------------------------------------------------------------------------------------------------------|------------|
| Xihengshan Fm   | Yellowish grey to purple, sandstone, mudstone, and coals          | Ostracodes: <i>Cypridea sp.</i><br>Plants: <i>Gleichenites nipponensis</i> , <i>Brachyphyllum besum</i> , <i>Sphenopteris nitidula</i>                                                                                                            | Ber.–Vlg.  |
| Longwangshan Fm | Whitish grey to purple, andesite lava, and andesitic tuff breccia | no fossils                                                                                                                                                                                                                                        | Vlg.       |
| Dawangshan Fm   | Purple to grey, andesitic tuff breccia                            | Plants: <i>Pagiophyllum sp.</i> , <i>Potozamites sp.</i> , <i>Otozamites sp.</i>                                                                                                                                                                  | Hau.–Brm.  |
| Gecun Fm        | Reddish orange, greenish grey, sandstone, and mudstone            | Charophytes: <i>Sphaerochara vertieillata</i> , <i>S. stontoni</i> , <i>Charites symmetrica</i> , <i>Flabellochara jurongica</i><br>Pollen and Spores: <i>Classopollis sp.</i> , <i>Cicatricosisporites sp.</i><br>Plants: <i>Frenelopsis sp.</i> | Apt.–Alb.  |
| Pukou Fm        | Reddish-purple to grey, pebbly sandstone                          | Ostracodes: <i>Cypridea sp.</i> , <i>Talicypridea sp.</i> , <i>Zizophocypris simakovi</i><br>Pollen and Spores: <i>Hizaeois porites</i> , <i>Welwitschia pites</i>                                                                                | Cen.–Con.  |
| Chishan Fm      | Reddish-purple to greenish-grey, sandstone and mudstone           | Ostracodes: <i>Cypridea cavernosa</i> , <i>Talicypridea sp.</i> , <i>Eucypris sp.</i><br>Plants: <i>Manica tholistoma</i>                                                                                                                         | San.–Maas. |

### Jiangnan Basin

| Formation | Lithology                  | Fossil assemblage                                                    | Age  |
|-----------|----------------------------|----------------------------------------------------------------------|------|
| Wulong Fm | Reddish to yellowish-grey, | Ostracodes: <i>Cypridea prognata</i> , <i>Mantelliana gigantea</i> , | Alb. |

|               |                                                            |                                                                                                                                                                                                                                                                                                                                                                                                                                                                                                                                                |             |
|---------------|------------------------------------------------------------|------------------------------------------------------------------------------------------------------------------------------------------------------------------------------------------------------------------------------------------------------------------------------------------------------------------------------------------------------------------------------------------------------------------------------------------------------------------------------------------------------------------------------------------------|-------------|
|               | conglomerate, sandstone, mudstone                          | <i>Zizophocypris simakovi</i> , <i>Monosulcocypris</i> sp.<br>Charophytes: <i>Mesochara symmetrica</i> , <i>M. stantoni</i> , <i>Flabellochara hangzhouensis</i> , <i>Euaclistochara mundula</i><br>Pollen and Spores: <i>Cicatricosisporites apicanalis</i> , <i>C. tersus</i> , <i>C. dorogensis</i> , <i>C. minutaetritatus</i> , <i>Klukisporites variegatus</i> , <i>Toroisporis pseudodorogensis</i> , <i>Lygodiumsporites subsimplex</i> , <i>Schizaeois porites cretaceus</i> S. <i>phaseolus</i><br>Plants: <i>Manica parceramosa</i> |             |
| Luojiang Fm   | Reddish-purple to grey, conglomerate, sandstone            | Ostracodes: <i>Cypridea cavernosa</i>                                                                                                                                                                                                                                                                                                                                                                                                                                                                                                          | Cen.–Tur.   |
| Honghuatao Fm | Reddish to yellowish orange, fine-grained eolian sandstone | Ostracodes: <i>Cypridea cavernosa</i> , <i>Talicypridea amoena</i> , <i>T. longa</i><br>Charophytes: <i>Porochara anluensis</i>                                                                                                                                                                                                                                                                                                                                                                                                                | Con.–San.   |
| Paomagang Fm  | Reddish to whitish grey, sandstone and mudstone            | Ostracodes: <i>Cypridea cavernosa</i> , <i>C. nanxiongensis</i> , <i>C. tera</i> , <i>Talicypridea amoena</i> , <i>T. longa</i> , <i>T. chinensis</i> , <i>T. quadrata</i><br>Charophytes: <i>Latochara cylindrica</i> , <i>L. curtula</i> , <i>L. yunnanensis</i> , <i>Peckichara dangyangensis</i> , <i>Charites tenuis</i>                                                                                                                                                                                                                  | Camp.–Maas. |

## Sichuan Basin

| Formation     | Lithology                                                 | Fossil assemblage                                                                                                                                                                                                                                                                                                                                                                                                                                                                                                                                                                                                                                                                                                                                                                                  | Age        |
|---------------|-----------------------------------------------------------|----------------------------------------------------------------------------------------------------------------------------------------------------------------------------------------------------------------------------------------------------------------------------------------------------------------------------------------------------------------------------------------------------------------------------------------------------------------------------------------------------------------------------------------------------------------------------------------------------------------------------------------------------------------------------------------------------------------------------------------------------------------------------------------------------|------------|
| Tianmashan Fm | Reddish-purple conglomerate, sandstone, and mudstone      | Ostracodes: <i>Deyangia lushanensis</i> , <i>D. postacuta</i> , <i>Cypridea</i> sp., <i>Jingguella obtusura</i> , <i>Lycoperocypris</i> sp., <i>Minheella</i> sp., <i>Zizophocypris</i> sp., <i>Mongolianella</i> sp.                                                                                                                                                                                                                                                                                                                                                                                                                                                                                                                                                                              | Ber.–Brm.  |
| Jiaguan Fm    | Reddish-purple, fine- to medium-grained, eolian sandstone | Ostracodes: <i>Cypridea angusticaudata</i> , <i>C. sichuanensis</i> , <i>C. yunnanensis</i> , <i>C. gunzulingensis</i> , <i>C. enodata</i> , <i>C. cf. ampullacea</i> , <i>C. concise</i> , <i>C. tera</i> , <i>C. cf. gibbosa</i> , <i>C. setina florida</i> , <i>C. setina acerata</i> , <i>C. setina bellatula</i> , <i>C. (Bisulcocypridea) sp.</i> , <i>C. (B.) chuxiongensis</i> , <i>C. (Morinina) monosulcata</i> , <i>Harbinia jingshanensis</i> , <i>Latonia (Monosulcocypris) spp.</i> , <i>Sinocypris (Quadracypris) cf. favosa</i> , <i>Talicypridea (Cristocypridea) sp.</i> , <i>Zizophocypris orbita</i> , <i>Z. acuta</i> , <i>Jinggunella</i> sp., <i>Kaitunia cuneata</i> , <i>Darwinmela</i> sp., <i>Timiriasevia</i> sp., <i>Lycoperocypris</i> sp., <i>Pinnocypridea</i> sp. | Apt.–Tur.  |
| Guankou Fm    | Red to purple, fine-grained sandstone, mudstone, gypsum   | Ostracodes: <i>Cypridea gigantea</i> , <i>C. infidelis</i> , <i>Cristocypridea latiovata</i> , <i>C. chinensis</i> , <i>Sinocypris subfuningensis</i> , <i>Candona huangdianensis</i> , <i>C. qionglaiensis</i> , <i>Nonion sichuanensis</i> ,                                                                                                                                                                                                                                                                                                                                                                                                                                                                                                                                                     | Con.–Maas. |

## Simao Basin

| Formation    | Lithology                                                      | Fossil assemblage                                                                                                                                                                                                                                                                                                                   | Age        |
|--------------|----------------------------------------------------------------|-------------------------------------------------------------------------------------------------------------------------------------------------------------------------------------------------------------------------------------------------------------------------------------------------------------------------------------|------------|
| Jingxing Fm  | Yellowish-grey to whitish-grey, sandstone, mudstone, and coals | Ostracodes: <i>Monosulcocypris reticulata</i> , <i>Cypridea angusticaudata</i> , <i>Candona yunnanensis</i> , <i>Rhinocypris tuberculata</i> , <i>Limnocythere tumulosa</i>                                                                                                                                                         | Ber.–Brm.  |
| Nanxin Fm    | Red to purple, sandstone, and mudstone                         | Ostracodes: <i>Monosulcocypris subovata</i> , <i>M. subelliptica</i> , <i>M. longa</i> , <i>M. gigantea</i> , <i>M. yunnanensis</i> , <i>M. ventricovexa</i> , <i>M. reticulata</i> , <i>Zizophocypris simakovi</i> , <i>Rhinocypris tuberculata</i><br>Charophytes: <i>Atopochara trivolis</i> , <i>Nodoclavator puchanghensis</i> | Apt.–Alb.  |
| Bashahe Fm   | Reddish-purple, eolian sandstone and sandy mudstone            | no fossils                                                                                                                                                                                                                                                                                                                          | Cen.–Tur.  |
| Mankuanhe Fm | Red to purple, sandy mudstone, and mudstone                    | Ostracodes: <i>Eucypris anluensis</i> , <i>Cypridea zhengdongensis</i> , <i>C. cavernosa</i> , <i>Sinocypris</i>                                                                                                                                                                                                                    | Con.–Maas. |

|  |  |                                                                                                                                                                                                                |  |
|--|--|----------------------------------------------------------------------------------------------------------------------------------------------------------------------------------------------------------------|--|
|  |  | <i>zhengdongensis</i> , <i>S. reniformis</i> , <i>Talicypridea subparallela</i> ,<br><i>T. xishuangbananensis</i> , <i>T. amoena</i><br>Charophytes: <i>Peckichara dongyangensis</i> , <i>Charites tenuisa</i> |  |
|--|--|----------------------------------------------------------------------------------------------------------------------------------------------------------------------------------------------------------------|--|

## Khorat Basin

| Formation        | Lithology                                                     | Fossil assemblage                                                                                                                                                                                                                                                                                                                                                                                                                                                                                                                     | Age           |
|------------------|---------------------------------------------------------------|---------------------------------------------------------------------------------------------------------------------------------------------------------------------------------------------------------------------------------------------------------------------------------------------------------------------------------------------------------------------------------------------------------------------------------------------------------------------------------------------------------------------------------------|---------------|
| Phu Kradong Fm   | Reddish brown, sandstone, siltstone, and mudstone             | Pollen and Spores: <i>Cyathidites minor</i> , <i>Baculatisporites commaumensis</i> , <i>Corollina simplex</i>                                                                                                                                                                                                                                                                                                                                                                                                                         | E. Cretaceous |
| Phra Wihan Fm    | Whitish-grey, conglomerate, sandstone, mudstone, and lignites | Pollen and Spores: <i>Cicatricosisporites augustus</i> , <i>Dicheiropollis etruscus</i> , <i>Corollina spp.</i> , <i>Araucariacites australis</i> , <i>Ischyosporites cf. variegatus</i> , <i>Gleichenidites senonicus</i> , <i>Laevigatosporites sp.</i> , <i>Perinopollenites elatoides</i> , <i>Callialasporites dampieri</i> , <i>Anaplanisporites dawsonensis</i> , <i>Apiculatisporites spp.</i> , <i>Osmundacidites wellmanii</i> , <i>Todisporites minor</i> , <i>Kraeuselisporites sp.</i> , <i>Concavissimisporites sp.</i> | Ber.–Brm.     |
| Sao Khua Fm      | Reddish brown, sandstone, siltstone, and mudstone             | Pollen and Spores: <i>Vitreisporites cf. pallidus</i> , <i>Cicatricosisporites spp.</i> , <i>Cyathidites minor spp.</i> , <i>Ephedripites spp.</i> , <i>?Araucariacites australis</i>                                                                                                                                                                                                                                                                                                                                                 | E. Cretaceous |
| Phu Phan Fm      | Whitish-grey, conglomerate, sandstone, mudstone               | Pollen and Spores: <i>Corollina spp.</i> , <i>Cyathidites minor</i> , <i>?Todisporites sp.</i>                                                                                                                                                                                                                                                                                                                                                                                                                                        | E. Cretaceous |
| Khok Kruat Fm    | Reddish brown, sandstone, siltstone, and mudstone             | Pollen and Spores: no data presented*                                                                                                                                                                                                                                                                                                                                                                                                                                                                                                 | Apt.?         |
| Maha Sarakhan Fm | Reddish, sandstone, siltstone, salts, gypsums, and anhydrites | Pollen and Spores: no data presented*                                                                                                                                                                                                                                                                                                                                                                                                                                                                                                 | Alb.?–Cen.?   |
| Phu Thok Fm      | Reddish, eolian sandstone and siltstone                       | no fossils                                                                                                                                                                                                                                                                                                                                                                                                                                                                                                                            | Apt.–Tur.?    |
| Phu Khat Fm      | Reddish to whitish grey, sandstone and mudstone               | no fossils                                                                                                                                                                                                                                                                                                                                                                                                                                                                                                                            | L. Cretaceous |

\*Palynological age estimations of the Khok Kruat and Maha Sarakhan Formations are quoted by Sattayarak et al. (1991a,b). However, no palyno-fossil assemblage data were presented.

**Table S2:** Stratigraphic compilation of the climate-sensitive sediments with special emphasis on desert (eolian dune) deposits cited in **Figure 3**.

| Locality No. | Basin                    | Formation                      | Lithology                                                                                                                      | Age                    | References                                         |
|--------------|--------------------------|--------------------------------|--------------------------------------------------------------------------------------------------------------------------------|------------------------|----------------------------------------------------|
| 1            | Gobi basin, Mongolia     | Khukhteeg and Bayanshiree Fms  | Whitish-grey, conglomerate, sandstone, mudstone, lignite, and Reddish-brown to whitish-grey, conglomerate, sandstone, mudstone | Alb. to Cen.–San.      | Jerzykiewicz and Russell, 1991; Khand et al., 2000 |
| 2            | Subei basin, China       | Gecun and Pukou Fms            | Reddish-orange to greenish-grey, sandstone, mudstone, and Reddish-purple to grey, pebbly sandstone                             | Apt.–Alb. to Cen.–Con. | Jiang and Li, 1996; Hao et al., 2000               |
| 3            | Jiangnan basin, China    | Wulong and Luojinghu Fms       | Reddish to yellowish-grey, conglomerate, sandstone, mudstone and Reddish-purple to grey, conglomerate, sandstone               | Alb. to Cen.–Tur.      | Jiang and Li, 1996; Hao et al., 2000               |
| 4            | Sichuan basin, China     | Jiaguan Fm                     | Reddish-purple, fine- to medium-grained, <u>eolian sandstone</u>                                                               | Apt.–Tur.              | Jiang et al., 2001                                 |
| 5            | Simao basin, China       | Nanxin and Bashahe Fms         | Reddish-purple, sandstone, mudstone and Reddish-purple, <u>eolian sandstone</u> , sandy mudstone                               | Apt.–Alb. to Cen.–Tur. | Jiang et al., 2001                                 |
| 6            | Khorat basin, Thailand   | Maha Sarakhan and Phu Thok Fms | Reddish, sandstone, siltstone, salts, gypsums, and Reddish, <u>eolian sandstone</u> , siltstone                                | Apt.–Tur.?             | Imsamut, 1996; Hasegawa et al., 2010               |
| 7            | Iberian basin, Spain     | Escucha and Utrillas Fms       | Fine-grained <u>eolian sandstone</u> , siltstone, mudstone                                                                     | Alb.–Cen.              | Rodriguez-Lopez et al., 2006, 2008                 |
| 8            | British Columbia, Canada | Boulder Creek Fm               | Grayish very fine-grained sandstone, Greenish-gray mudstone, sphaerosiderite-bearing paleosol                                  | Alb.–Cen.              | Leckie et al., 1989; Ufnar et al., 2005            |
| 9            | North Alberta, Canada    | Peace River Fm                 | Grayish sandstone, mudstone, sphaerosiderite-bearing paleosol                                                                  | Alb.–Cen.              | Ufnar et al., 2005                                 |
| 10           | South Alberta, Canada    | Mill Creek and Bow Island Fms  | Reddish and grayish-greenish sandstone, pale yellow to dark red mudstone, paleosol                                             | Alb.                   | McCarthy et al., 1997, 1999                        |
| 11           | Ontario basin, Canada    | Mattagami Fm                   | Varicolored conglomerate, sandstone, mudstone, lignite                                                                         | Apt.–Alb. to Cen.      | White et al., 2000                                 |
| 12           | Western Iowa basin       | Dakota and Swan River Fms      | Grayish sandstone, mudstone, sphaerosiderite-bearing paleosol                                                                  | Alb.–Cen.              | Ludvigson et al., 1998; White et al., 2000         |
| 13           | Southwest Utah basin     | Upper part of the Dakota Fm    | Varicolored conglomerate, sandstone, mudstone, coal                                                                            | Cen.–Tur.              | Laurin and Sageman, 2007; Barclay et al., 2010     |
| 14           | New Mexico basin         | Sarten and Moreno Hill Fms     | Reddish to pale yellowish sandstone, mudstone, paleosol                                                                        | Alb.–Cen. to Tur.      | Mack, 1992                                         |
| 15           | Araripe basin, Brazil    | Santana Fm                     | Sandstone, mudstone, black shale                                                                                               | Alb.                   | Heimhofer et al., 2008                             |
| 16           | Salta basin, Argentina   | La Yesera Fm                   | Reddish-brown conglomerate, sandstone, siltstone, mudstone                                                                     | Apt.–Alb.              | Marquillas et al., 2005                            |
| 17           | Neuquen basin, Argentina | Lohan Cura Fm                  | Reddish-brown to greenish gray conglomerate, sandstone, siltstone,                                                             | Apt.–Alb.              | Leanza et al., 2004                                |

|    |                               |                                    |                                                                                            |               |                                                                  |
|----|-------------------------------|------------------------------------|--------------------------------------------------------------------------------------------|---------------|------------------------------------------------------------------|
|    |                               |                                    | shale                                                                                      |               |                                                                  |
| 18 | Orange basin, Namibia         | Alb. to Cen. succession            | Whitish conglomerate, sandstone, siltstone, mudstone                                       | Alb.–Cen.     | Stevenson and McMillan, 2004;                                    |
| 19 | Tendaguru basin, Tanzania     | Makonde Fm                         | Reddish to purple, conglomerate, fine- to medium-grained sandstone, siltstone, mudstone    | Apt.–Alb.     | Bussert et al., 2009                                             |
| 20 | Saurashtra basin, India       | Than and Wadhwan Fms               | Grayish sandstone, mudstone, coal and Reddish conglomerate, sandstone, mudstone, limestone | E. Cretaceous | Aslam, 1992                                                      |
| 21 | Gippsland basin, Australia    | Wonthaggi Fm                       | Volcanogenic sandstone, mudstone, coal                                                     | Apt.–Alb.     | Douglas and Williams, 1982;<br>Tosolini et al., 2002             |
| 22 | Gobi basin, Mongolia          | Djadokhta, Barungoyot, Dzunmod Fms | Reddish brown to whitish grey, <u>eolian sandstone</u> , sandy mudstone, calcrete          | Camp.–Maas.   | Jerzykiewicz and Russell, 1991;<br>Hasegawa et al., in submitted |
| 23 | Ordos basin, China            | Tagaimiao Fm                       | Red to orange, fine- to medium-grained, <u>eolian sandstone</u>                            | San.–Camp.    | Jiang and Li, 1996;<br>Hao et al., 2000                          |
| 24 | Tarim basin, China            | Subashi Fm                         | Whitish-grey to reddish, medium to coarse-grained sandstone, mudstone                      | Camp.–Maas.   | Jiang and Li, 1996;<br>Hao et al., 2000                          |
| 25 | Subei basin, China            | Chishan Fm                         | Reddish-purple to greenish-grey, sandstone, mudstone                                       | San.–Maas.    | Jiang and Li, 1996;<br>Hao et al., 2000                          |
| 26 | Jiangnan basin, China         | Paomagang Fm                       | Reddish to whitish grey, sandstone, mudstone                                               | Camp.–Maas.   | Jiang and Li, 1996;<br>Hao et al., 2000                          |
| 27 | Sichuan basin, China          | Guankou Fm                         | Red to purple, fine-grained sandstone, mudstone, gypsum                                    | Con.–Maas.    | Jiang et al., 2001                                               |
| 28 | Simao basin, China            | Mankuanhe Fm                       | Red to purple, sandy mudstone, mudstone                                                    | Con.–Maas.    | Jiang et al., 2001                                               |
| 29 | Khorat basin, Thailand        | Phu Khat Fm                        | Reddish to whitish grey, sandstone, mudstone                                               | L. Cretaceous | Hasegawa et al., 2010                                            |
| 30 | South Alberta, Canada         | Belly River and Willow Creek Fms   | Reddish brown to whitish grey, conglomerate, sandstone, mudstone, calcrete                 | Camp.–Maas.   | Jerzykiewicz and Sweet, 1988;                                    |
| 31 | Western Montana basin, Canada | Two Medicine Fm                    | Reddish brown to whitish grey, conglomerate, sandstone, mudstone, calcrete                 | Camp.–Maas.   | Lorenz, 1981                                                     |
| 32 | Eastern Montana basin, Canada | Hell Creek Fm                      | Varicolored conglomerate, sandstone, mudstone, coal                                        | Maas.         | Retallack, 1994;<br>Johnson et al., 2002                         |
| 33 | North Dakota basin            | Hell Creek Fm                      | Varicolored conglomerate, sandstone, mudstone, coal                                        | Maas.         | Fastovsky and McSweeney, 1987<br>Johnson et al., 2002            |
| 34 | Southwest Utah basin          | Wahweap and Kaiparowits Fms        | Varicolored conglomerate, sandstone, mudstone                                              | Camp.–Maas.   | Lawton et al., 2003                                              |
| 35 | New Mexico basin              | MacRae Fm                          | Reddish-brown to greyish, conglomerate, sandstone, mudstone, calcrete                      | Maas.         | Buck and Mack, 1995                                              |
| 36 | Western Texas basin           | Aguja and Javelina Fms             | Reddish purple to grayish, sandstone, mudstone, paleosol                                   | Maas.         | Lehman, 1989, 1990                                               |
| 37 | Salta basin,                  | Lecho Fm                           | Whitish, fine- to medium-grained,                                                          | Maas.         | Marquillas et al., 2005                                          |

|    |                            |                            |                                                                                |              |                                               |
|----|----------------------------|----------------------------|--------------------------------------------------------------------------------|--------------|-----------------------------------------------|
|    | Argentina                  |                            | <u>eolian sandstone</u>                                                        |              |                                               |
| 38 | Bauru basin, Brazil        | Rio Parana Fm, Caiua Gp.   | Fine- to medium-grained, quartz <u>eolian sandstone</u>                        | Con.–Maas.   | Fernandes et al., 2007                        |
| 39 | Parana basin, Brazil       | Marilia Fm                 | Medium- to coarse-grained, quartz-feldspar <u>eolian sandstone</u> , calcretes | Maas.        | Goldberg and Garcia, 2000                     |
| 40 | Neuquen basin, Argentina   | Anacleto and Allen Fms     | Reddish to greenish-gray, conglomerate, sandstone, siltstone, mudstone         | San.–Maas.   | Leanza et al., 2004                           |
| 41 | Anambra basin, Namibia     | Mamu and Ajali Fms         | Conglomerate, sandstone, shale, coal                                           | Camp.–Maas.  | Tuttle, 1999                                  |
| 42 | Congo basin, Angola        | Nsele Gp                   | Medium- to coarse-grained sandstone, <u>eolian accumulation texture</u>        | L.Cretaceous | Giresse, 2005                                 |
| 43 | Orange basin, Namibia      | Upper Santonian succession | Brownish sandstone, mudstone                                                   | L. Santonian | Stevenson and McMillan, 2004;                 |
| 44 | Dongargaonbasin, India     | Lameta Fm                  | Reddish to greenish, conglomerate, sandstone, mudstone, calcrete               | Maas.        | Mohabey et al., 1993; Mohabey, 1996           |
| 45 | Gippsland basin, Australia | Latrobe Gp.                | Conglomerate, sandstone, mudstone, coal, volcanics                             | Camp.–Maas.  | Wagstaff et al., 2006; Gallagher et al., 2008 |



## Supplementary Methods:

### *Paleoposition of eolian sandstone deposits in Asian interior basins*

Paleolatitude and rotation estimates of the studied basins, which are reconstructed based on paleomagnetic data (Cheng et al., 1988; Zhuang, 1988; Otofujii et al., 1990; Enkin et al., 1991; Zheng et al., 1991; Chen et al., 1993; Huang and Opdyke, 1993; Hankard et al., 2005; Charusiri et al., 2006; **Fig. 1** and **Table 1**), are the critical basis for the present study which demonstrate that the location of the subtropical high-pressure belt changed significantly during the Cretaceous. Based on the obtained paleomagnetic data sets, paleolatitudes of the North China block (Ordos Basin: N32.6°–41.0°; Cheng et al., 1988; Zheng et al., 1991) and the South China block (Sichuan Basin: N25.5°–29.6°; Zhuang *et al.*, 1988; Enkin et al., 1991) were different by more than 5° during the Cretaceous (**Fig. 1** and **Table 1**). The Gobi Basin of southern Mongolia was located much higher latitude during the Cretaceous (N44.0°–46.1°; Hankard et al., 2005). Reconstruction of the paleoposition of Indochina block during the Cretaceous, prior to the India-Asia collision, has been controversial. For example, Chen *et al.* (1992) argued that both Indochina block and South China block were located between N20° and N30° during the Cretaceous, based on the paleomagnetic data reported by Yang and Basse (1993). However, the paleomagnetic data reported by Yang and Basse (1993) is for the upper Triassic to the lower Cretaceous deposits in the Khorat Basin (Indochina block) in northeastern Thailand, and no paleomagnetic data of the mid- to upper Cretaceous deposits, which contain eolian sandstone deposits in this area, was reported. On the other hand, Charusiri et al. (2006) conducted the paleomagnetic study on the mid- to upper Cretaceous deposits in the Khorat Basin, northeastern Thailand for the first time. They concluded that the Khorat Basin was located between N16.3° and 21.6° during the mid- to late Cretaceous time (Charusiri et al., 2006), which was much lower than that of South China block (N25.5°–29.6°; Zhuang *et al.*, 1988; Enkin et al., 1991). Therefore, eolian sandstones were distributed in ca. N30°–40° (Ordos and Tarim basins) during the early Cretaceous, shifted southwards to ca. N20°–30° (Sichuan and Khorat basins) during the mid-Cretaceous, and shifted northwards again to ca. N30°–45° (Gobi and Ordos basins) during the late Cretaceous, implying that the significant latitudinal shifts of the distribution of eolian sandstone deposits have occurred between the early, mid-, and late Cretaceous (**Fig. 1**).

### *Age constraints for eolian sandstone formations in Asian interior basins*

Although non-marine strata generally have chronostratigraphic uncertainties, our selected data sets of eolian sandstone formations in the Asian interior basins have good age controls based on magnetostratigraphy and/or biostratigraphy (Li, 1982; Jerzykiewicz and Russell, 1991; Jiang and Li, 1996; Racey et al., 1996; Hao et al., 2000; Khand et al., 2000; Meesok, 2000; Jiang et al., 2001; Chen et al., 2006; Sha, 2007; **Fig. 1** and **Table S1**), including the results of our magnetostratigraphic studies (Imsamut, 1996; Pan et al., 2004; Hasegawa et al., 2010; **Figs. S1, S2**). Paleontological age constraints provide a starting point for the ages of the eolian sandstone formations cited in this study. A relatively rich record of fossil ostracods, charophytes, plants, pollens, and spores has been collected from the studied sites (**Table S1**). Particularly important are the ages of the eolian sandstone formations in Sichuan Basin and Khorat Basin (the Jiaguan Formation and the Phu Thok Formation), because they provide the critical time constraints on the low latitude desert distribution during the mid-Cretaceous. The ages of these formations are well constrained by our magnetostratigraphic data (Imsamut, 1996; Pan et al., 2004; Hasegawa et al., 2010) in conjunction with paleontological age constraints as described below.

The age of the Jiaguan Formation in Sichuan Basin is assigned to the Aptian–Turonian based on the ostracod's biostratigraphy of the Jiaguan Formation, which yields age-diagnostic ostracodes such as *Ziziphocypris orbita*, *Cypridea (Bisulcocypridea)* sp. (Cenomanian–Turonian), and *Latonia (Monosulcocypris)* spp. (Aptian) (Li, 1982; Hao et al., 2000; Chen et al., 2006; **Table S1**). Such age constraint is consistent with the ostracod's biostratigraphy of the underlying Tianmashan Formation (Berriasian–Barremian) and overlying Guankou Formation (Coniacian–Maastrichtian). In addition, the obtained paleomagnetic polarity sequence of the Jiaguan Formation reveals short repetition of reverse-normal-reverse polarity changes in its lowermost part and thick normal polarity zone in its main part (Pan et al., 2004), which correlate best with chron M1r to superchron C34n of the geomagnetic polarity time scale (GPTS; Gradstein et al., 2004). These results suggest that deposition of the Jiaguan Formation began approximately at 127 Ma and ended no later than ca. 84 Ma (from late Barremian–early Aptian to no later than late Santonian) (Pan et al., 2004; **Fig. S1**).

Age constraints of the Phu Thok Formation in Khorat Basin are provided by the palynological evidences of the underlying strata, the lignite-bearing Phra Wihan Formation, which yields

age-diagnostic palyno-fossils such as *Cicatricosisporites augustus* indicating the age no older than Berriasian and *Dicheiropollis etruscus* indicating the age of Barremian (Racey et al., 1996). Thus, age of the Phra Wihan Formation is assigned to the early Cretaceous (Berriasian–Barremian), and the age of the overlying Phu Thok Formation is younger than Barremian age (Racey et al., 1996; Meesok, 2000; DMR, 2001; Charusiri et al., 2006; **Table S1**). Our newly established paleomagnetic polarity sequence of the Phu Thok Formation reveals short repetition of reverse-normal-reverse polarity changes in its lowermost part and thick normal polarity zone in its main part (Imsamut, 1996; Hasegawa et al., 2010; **Fig. S2**), which can be correlated with chron M1n to superchron C34n of the GPTS (Gradstein et al., 2004). Consequently, deposition of the Phu Thok Formation is interpreted as having started approximately at 126 Ma and ended no younger than ca. 84 Ma (from late Barremian–early Aptian to no younger than late Santonian), which is approximately the same age as the Jiaguan Formation in Sichuan Basin. In summary, the low latitude deserts in Asia emerged between late Barremian and early Aptian and disappeared between Turonian and Coniacian according to the magnetostratigraphic correlations and paleontological age constraints of the eolian sandstone formations in the Sichuan Basin (Jiaguan Formation) and the Khorat Basin (Phu Thok Formation) given above (**Fig. 1**).

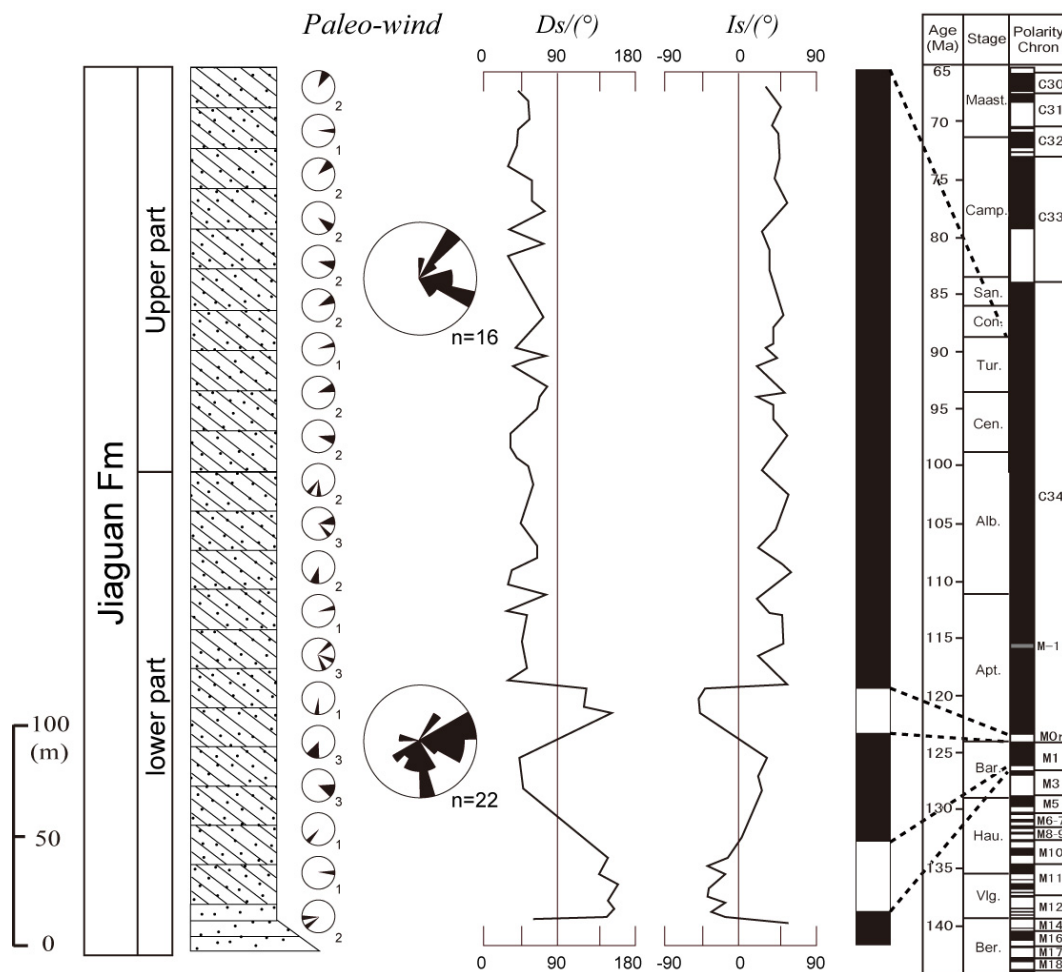

**Fig. S1:** Lithostratigraphic column, paleowind direction data, and magnetic polarity sequence of the eolian sandstone deposits (Jiaguan Formation) in Sichuan Basin, south China (Jiang et al., 1999; Pan et al., 2004; Hasegawa et al., 2010), and their correlation to the geomagnetic polarity time scale (GPTS) of the geological time scale 2004 (Gradstein et al., 2004). Magnetic polarity zones are shown by black and white bars for normal and reversed polarities.

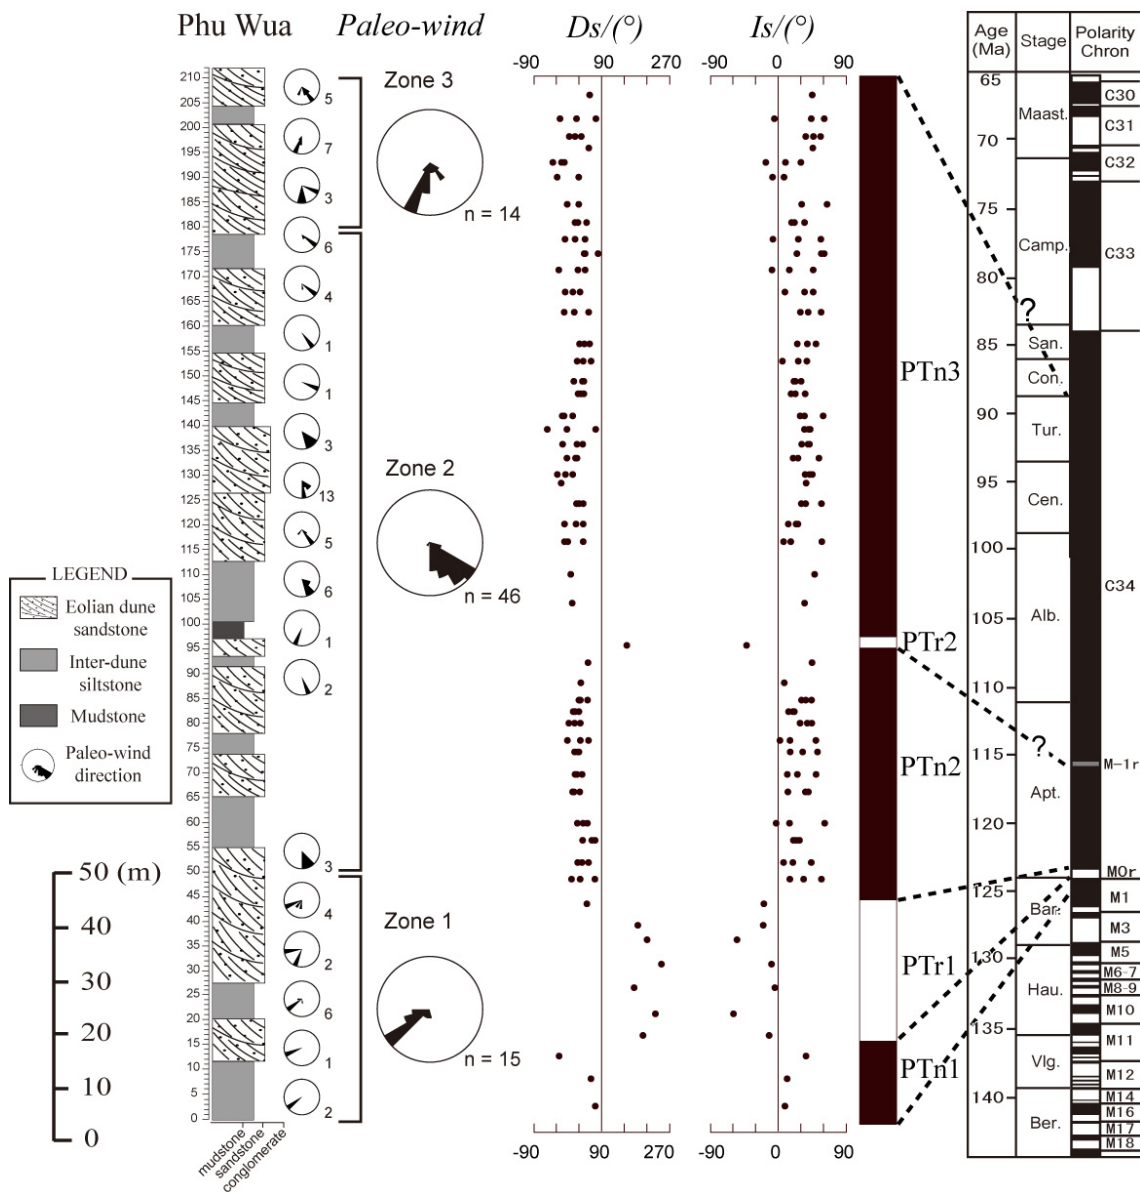

**Fig. S2:** Lithostratigraphic column, paleowind direction data, and magnetic polarity sequence of the eolian sandstone deposits (Phu Thok Formation) in the Khorat Basin, northeast Thailand (Imsamut, 1996; Hasegawa et al., 2010), and their correlation to the GPTS (Gradstein et al., 2004). Magnetic polarity zones are shown by black (white) bars for normal (reversed) polarity.

## Supplementary References

- Aslam, M., 1992. Delta plain coal deposits from the Than Formation of the Early Cretaceous Saurashtra basin, Gujarat, western India. *Sedimentary Geology* 81, 181–193.
- Barclay, R.S., McElwain, J.C., Sageman, B.B., 2010. Carbon sequestration activated by a volcanic CO<sub>2</sub> pulse during Ocean Anoxic Event 2. *Nature Geoscience* 3, 205–208.
- Buck, B.J., Mack, G.H. 1995. Latest Cretaceous (Maastrichtian) aridity indicated by paleosols in the McRae Formation, south-central New Mexico. *Cretaceous Research* 16, 559–572.
- Bussert, R., Heinrich, W.D., Aberhan, M., 2009. The Tendaguru Formation (Late Jurassic to Early Cretaceous, southern Tanzania): definition, palaeoenvironments, and sequence stratigraphy. *Fossil Record* 12, 141–174.
- Douglas, J.G., Williams, G.E., 1982. Southern polar forests: The Early Cretaceous floras of Victoria and their palaeoclimatic significance. *Palaeogeography, Palaeoclimatology, Palaeoecology* 39, 171–185.
- Fastovsky, D.E., McSweeney, K., 1987. Paleosols spanning the Cretaceous-Paleogene transition, eastern Montana and western North Dakota. *Geological Society of America Bulletin* 99, 66–77.
- Gallagher, S.J., Wagstaff, B.E., Baird, J.G., Wallace, M.W., Li, C.L., 2008. Southern high latitude climate variability in the Late Cretaceous greenhouse world. *Global and Planetary Change* 60, 351–364.
- Hasegawa, H., Sukanuma, Y., Seike, K., Tada, R., Ichinnorov, N., Badamgarav, D., Khand, Y., in submitted. Magnetostratigraphy and depositional environments of Upper Cretaceous deposits in the Gobi Basin, southern Mongolia: implications for desert development in mid-latitude Asia. (submitted to *Journal of Asian Earth Sciences*)
- Heimhofer, U., Hesselbo, S.P., Pancost, R.D., Martill, D.M., Hochuli, P.A., Guzzo, J.V.P., 2008. Evidence for photic-zone euxinia in the Early Albian Santana Formation (Araripe Basin, NE Brazil). *Terra Nova* 20, 347–354.
- Jerzykiewicz, T., Sweet, A.R., 1988. Sedimentological and palynological evidence of regional climatic changes in the Campanian to Paleocene sediments of the Rocky Mountain Foothills, Canada. *Sedimentary Geology* 59, 29–76.
- Jiang, X.S., Pan, Z.X., Fu, Q.P., 1999. The variations of palaeowind direction of the Cretaceous desert in the Sichuan Basin and their significance. *Sedimentary Facies and Palaeogeography* 19, 1–11.
- Johnson, K.R., Nichols, D.J., Hartman, J.H., 2002. Hell Creek Formation: A 2001 synthesis.

- Geological Society of America Special Paper 361, 503–510.
- Laurin, J., Sageman, B., 2007. Cenomanian-Turonian coastal record in SW Utah, USA: Orbital scale transgressive-regressive events during Oceanic Anoxic Event II. *Journal of Sedimentary Research* 77, 731–756.
- Lawton, T.F., Polloch, S.L., Robinson, R.A.J., 2003. Integrating sandstone petrology and nonmarine sequence stratigraphy: Application to the late cretaceous fluvial systems of southwestern Utah, USA. *Journal of Sedimentary Research* 73, 389–406.
- Leanza, H.A., Apesteguia, A., Novas, F.E., de la Fuente, M.S., 2004. Cretaceous terrestrial beds from the Neuquén Basin (Argentina) and their tetrapod assemblages. *Cretaceous Research* 25, 61–87.
- Leckie, D., Fox, C., Tarnocai, C., 1989. Multiple paleosols of the late Albian Boulder Creek Formation, British Columbia, Canada. *Sedimentology* 36, 307–323.
- Lehman, T.M., 1989. Upper Cretaceous (Maastrichtian) Paleosols in Trans-Pecos Texas. *Geological Society of America Bulletin* 101, 188–203.
- Lehman, T.M., 1990. Paleosols and the Cretaceous/Tertiary transition in the Big Bend region of Texas. *Geology* 18, 362–364.
- Lorenz, J.C., 1981. Sedimentary and tectonic history of the Two Medicine Formation, Late Cretaceous (Campanian), northwestern Montana. Ph.D. Thesis, Princeton University, Princeton, N.J., pp.214 .
- Mack, G.H., 1992. Paleosols as an indicator of climatic-change at the early-late Cretaceous boundary, Southwestern New Mexico. *Journal of Sedimentary Petrology* 62, 483–494.
- McCarthy, P.J., Martini, I.P., Leckie, D.A., 1997. Anatomy and evolution of a Lower Cretaceous alluvial plain: Sedimentology and palaeosols in the upper Blairmore Group, south-western Alberta, Canada. *Sedimentology* 44, 197–220.
- McCarthy, P.J., Martini, I.P., Leckie, D.A., 1999. Pedogenic and diagenetic influences on void coating formation in Lower Cretaceous paleosols of the Mill Creek Formation, southwestern Alberta, Canada. *Geoderma* 87, 209–237.
- Mohabey, D.M., Udhoji, S.G., Verma, K.K., 1993. Palaeontological and sedimentological observations on non-marine Lameta Formation (Upper Cretaceous) of Maharashtra, India: their palaeoecological and palaeoenvironmental significance. *Palaeogeography, Palaeoclimatology, Palaeoecology* 105, 83–94.
- Mohabey, D.M., 1996. A new oospecies, *Megaloolithus matleyi*, from the Lameta Formation (Upper Cretaceous) of Chandrapur district, Maharashtra, India, and general remarks on the

- palaeoenvironment and nesting behaviour of dinosaurs. *Cretaceous Research* 17, 183–196.
- Racey, A., Love, M. ., Canham, A. C., Goodall, J. G. S., Polachan, S., and Jones, P. D.: Stratigraphy and reservoir potential of the Mesozoic Khorat Group, NE Thailand, *J. Petrol. Geol.*, 19, 5–40, 1996.
- Retallack, G.J., 1994. A pedotype approach to latest Cretaceous and earliest Tertiary paleosols in eastern Montana. *Geological Society of America Bulletin* 106, 1377–1397.
- Rodriguez-Lopez, J.P., de Boer, P.L., Melendez, N., Soria, A.R., Pardo, G., 2006. Windblown desert sands in coeval shallow marine deposits: a key for the recognition of coastal ergs in the mid-Cretaceous Iberian Basin, Spain. *Terra Nova* 18, 314–320.
- Sattayarak, N., Srigulwong, S., Patarametha, M., 1991a. Subsurface stratigraphy of the non-marine Mesozoic Khorat Group, Northern Thailand. *GEOSEA VII*, Bangkok, 36A.
- Sattayarak, N., Polachan, S., Charusirisawad, R., 1991b. Cretaceous rock salt in the northeastern part of Thailand. *GEOSEA VII*, Bangkok, 36A.
- Stevenson, I.R., McMillan, I.K., 2004. Incised valley fill stratigraphy of the Upper Cretaceous succession, proximal Orange Basin, Atlantic margin of southern Africa. *Journal of the Geological Society, London* 161, 185–208.
- Tosolini, A.M.P., McLoughlin, S., Drinnan, A.N., 2002. Early Cretaceous megaspore assemblages from southeastern Australia. *Cretaceous Research* 23, 807–844.
- Tuttle, M.L.W., Charpentier, R.R., Brownfield, M.E., 1999. The Niger Delta Petroleum System: Niger Delta Province, Nigeria, Cameroon, and Equatorial Guinea, Africa. Open-File Report, U.S. Department of the Interior, U.S. Geological Survey, pp.64.
- Ufnar, D. F., Gonzalez, L. A., Ludvigson, G. A., Brenner, R. L., Witzke, B. J. Leckie, D., 2005. Reconstructing a mid-Cretaceous landscape from paleosols in western Canada. *Journal of Sedimentary Research* 75, 984–996.
- Wagstaff, B.E., Gallagher S.J., Lanigan, K.P., 2006. Late Cretaceous palynological correlation and environmental analysis of fluvial reservoir facies of the Tuna Field, Gippsland Basin, southeast Australia. *Review of Palaeobotany and Palynology* 138, 165–186.
- White, T.S., Witzke, B., Ludvigson, G., 2000. Evidence for an Albian Hudson Arm of the North American Cretaceous Western Interior Seaway. *Geological Society of America Bulletin* 112, 1342–1355.
- Yang, Z., and Basse, J.: Paleomagnetic study of Permian and Mesozoic sedimentary rocks from Northern Thailand supports the exteuction model for Indochina, *Earth Planet. Sc. Lett.*, 117, 525–552, 1993.
